# Supplementary material
Source: publisher figshare collection journal article supplement (https://acs.figshare.com/ndownloader/files/4190446)
Supplement: Supplementary file 1 [file 4190446]

## Supporting Information:

# Chemical Treatment of Poly(lactic acid) Fibers to Enhance Thermal Depolymerization

*Hefei Dong, Aaron P. Esser-Kahn, Piyush R. Thakre, Jason F. Patrick,*

*Nancy R. Sottos, Scott R. White and Jeffrey S. Moore<sup>\*</sup>*

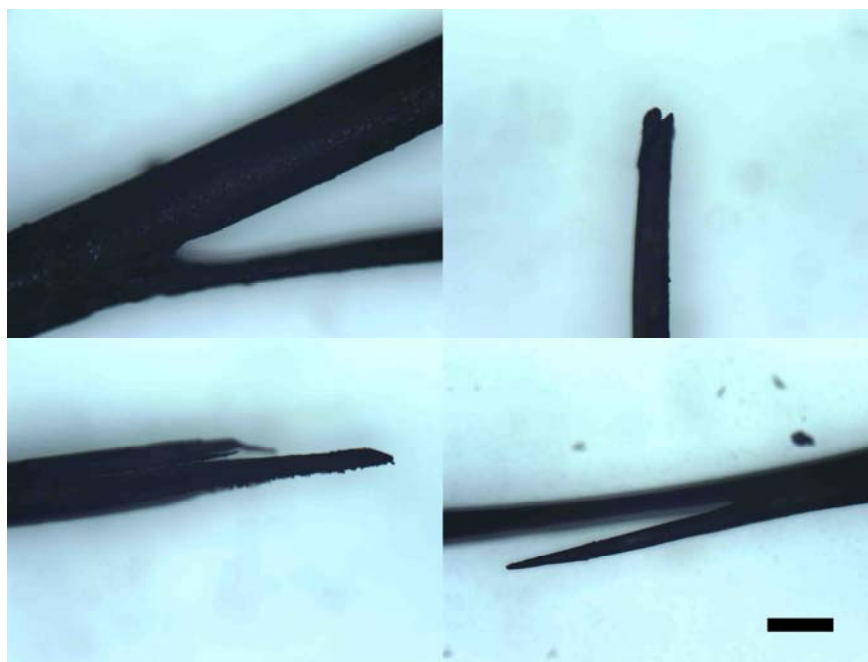

FIGURE S1. Optical image showing the deterioration of PLA fiber (500  $\mu\text{m}$ ) after treatment with SrO (Scale bar: 250  $\mu\text{m}$ ).

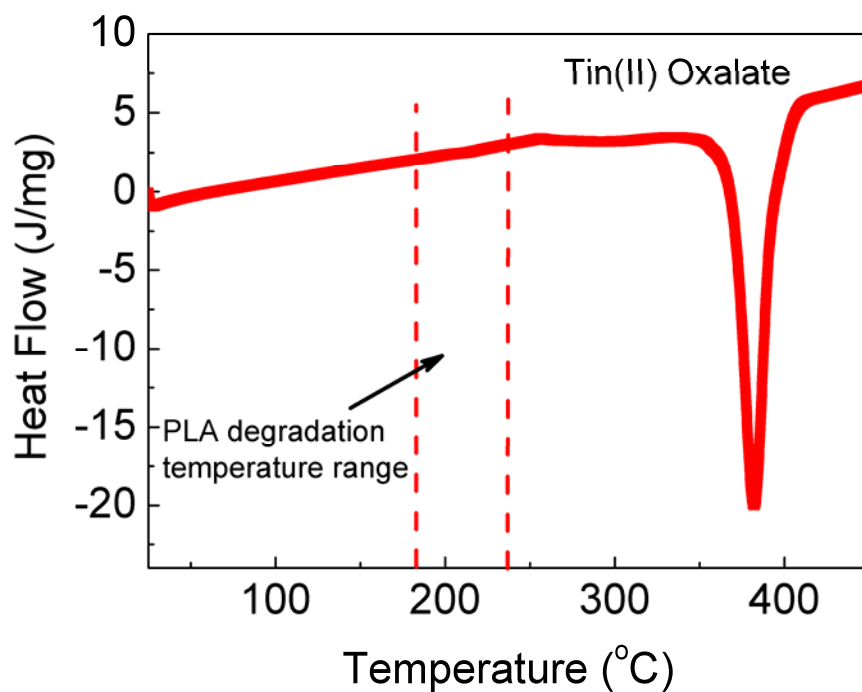

FIGURE S2. DSC curve for tin(II) oxalate showing its thermal stability up to PLA depolymerization temperature range (180 °C–240 °C).

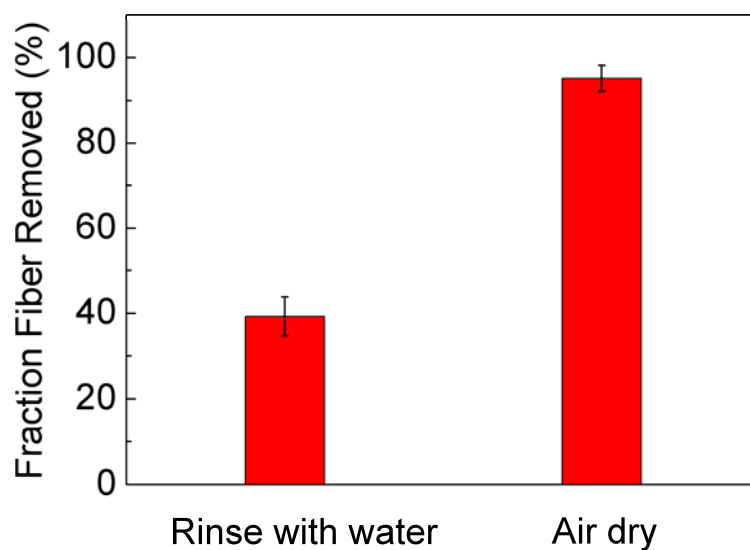

FIGURE S3. Fiber removal fraction data using different post-exposure treatments (fiber diameter: 500  $\mu\text{m}$ , solvent composition: 60 % TFE, tin(II) oxalate concentration: 2 wt%, soak time: 12 h, thermal treatment temperature: 200 °C, thermal treatment time: 2 h).

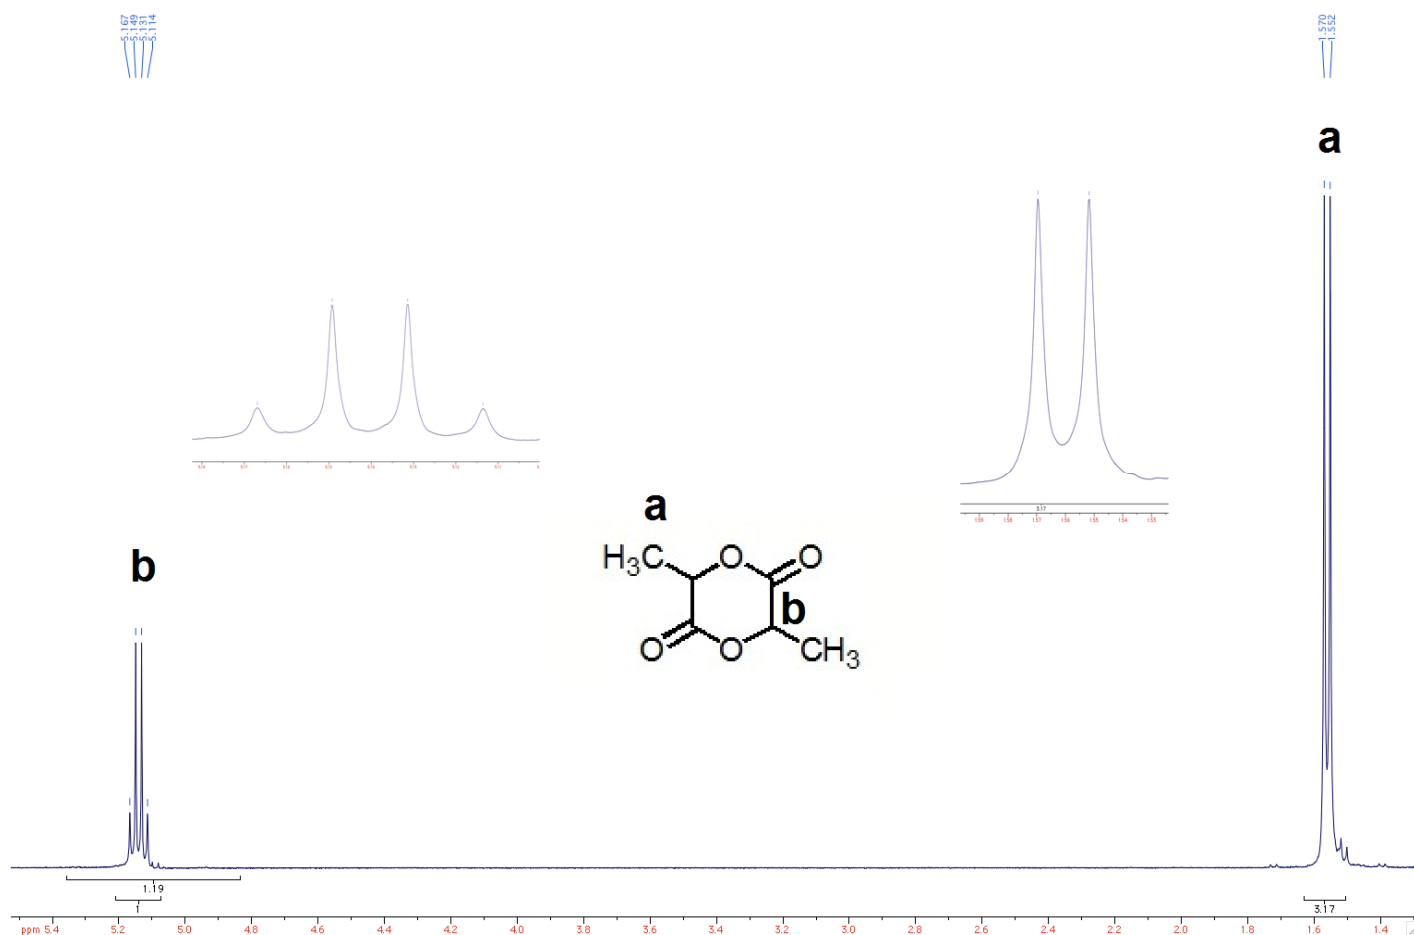

FIGURE S4. <sup>1</sup>H NMR (Solvent: CDCl<sub>3</sub>) spectrum and splitting patterns for product of tin(II) oxalate treated PLA fiber (500 μm) heated at 240 °C for 4 h (Cropped to show the alkyl region only).

### Degradation Mechanism Study

Using the approach developed by Murray et al, the number average chain length ( $N$ ) of a polymer during the course of random chain scission is given by

$$N_t = \frac{N_0}{B+1} \quad (1)$$

where  $N_0$  is the initial number average chain length and  $N_t$  is the number after an average of  $B$  bonds

have been broken per original molecule. The degree of degradation,  $\alpha$ , is defined by  $\alpha = \frac{B}{N_0 - 1}$  which

reduced to

$$\alpha = \frac{B}{N_0} \quad (2)$$

for large number of  $N_0$ .

Assume the chain scission rate (the ester hydrolysis rate) remains constant during the entire degradation process, that is

$$\alpha = kt \quad (3)$$

Combining (1) (2) (3) we get:

$$N_t = \frac{1}{\frac{1}{N_0} + kt}$$

which is the governing equation of  $N_t$  as a function of  $t$ .

Fit the experimental data with the function

$$y = \frac{1}{a + bx}$$

we get:

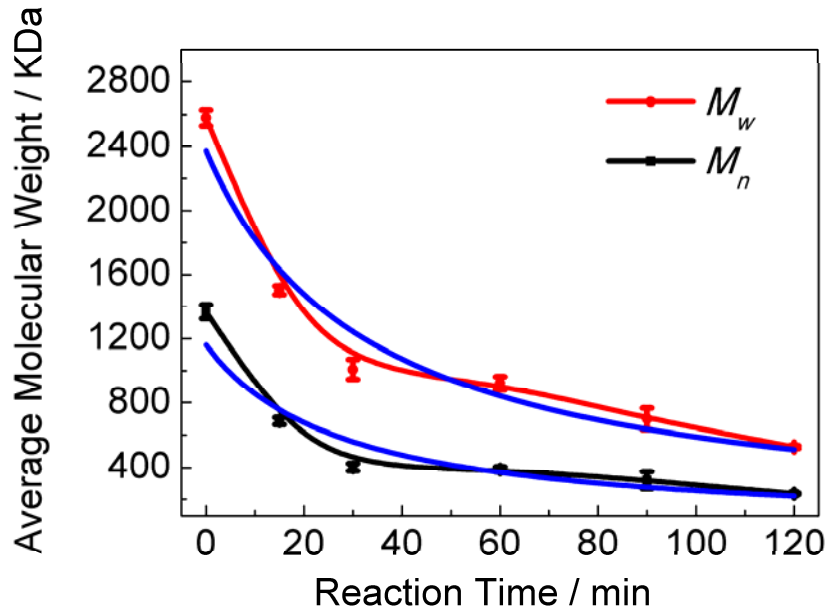

FIGURE S5. Average molecular weight plotted as a function of reaction time and fitting curves (blue) assuming a chain random scission model.
